# Supplementary material for: A novel label-free capillary electrophoresis LED-induced fluorescence platform based on catalytic hairpin assembly for sensitive detection of multiple circulating tumor DNA
Source: Royal Society of Chemistry journal article supplement (doi:10.1039/d3an01993d), 2024-01-01
Supplement: d3an01993d1.pdf [file d3an01993d1.pdf]

## Supplementary information

### A Novel Label-Free Capillary Electrophoresis LED-Induced Fluorescence Platform Based on Catalytic Hairpin Assembly for Sensitive Detection of Multiple Circulating Tumor DNA

Yanyan Sun<sup>§</sup>, Si He<sup>§</sup>, Yufei Peng<sup>§</sup>, Min Liu<sup>§</sup>, Danke Xu<sup>§, \*</sup>

<sup>§</sup>: State Key Laboratory of Analytical Chemistry for Life Science, School of Chemistry and Chemical Engineering, Nanjing University, No 163, Xianlin Avenue, Nanjing, 210023, PR China

\*: corresponding author, Tel: +86-025-89685835, Email: xudanke@nju.edu.cn

**Table S1** DNA oligonucleotide sequences involved in this work

| Name   | Sequences (5'-3')                                |
|--------|--------------------------------------------------|
| H1-PI  | ATCCTCTCTCTAAAATCACTGAGGTACGCTCTCAGTGATTTTA      |
| H2-PI  | ACTGAGAGCGTACCTCAGTGATTTTAGTACGCT                |
| PIK3CA | CTCAGTGATTTTAGAGAGAGGAT                          |
| H1-TP  | TGGGGGCAGCGCCTCACAACCTCCCATGTGTAGAGAGGTTGTGAGGCG |
| H2-TP  | ACAACCTCTCTACACATGGGAGGTTGTGAGGCGCCATGTGTAGA     |
| TP53   | GAGGTTGTGAGGCGCTGCCCCACCATG                      |
| MT1-PI | CTCAGTGATTTTAGTGAGAGGAT                          |
| MT1-TP | GAGGTTGTGAGGCGCTGCGCCCACCATG                     |
| MT3-PI | CTCTGTCATTTTAGTGAGAGGAT                          |
| MT3-TP | GAGGTTGAGAGGCGGTGGCCCCACCATG                     |
| Random | GTAGCTTATCAGACTCGACTTAGATGT                      |

**Table S2**  $\Delta G$  of all hairpin probes and hybrid complexes in the CHA system

| Targets | Name         | $\Delta G$ (kcal/mol) |
|---------|--------------|-----------------------|
| PIK3CA  | H1-PI        | -8.7                  |
|         | H2-PI        | -4.53                 |
|         | PIK3CA       | -2.91                 |
|         | H1-PI/PIK3CA | -22.94                |
|         | H1-PI/H2-PI  | -30.76                |
|         | H1-TP        | -14.14                |
| TP53    | H2-TP        | -7.77                 |
|         | TP53         | -1.92                 |
|         | H1-TP/TP53   | -32.51                |
|         | H1-TP/H2-TP  | -43.12                |

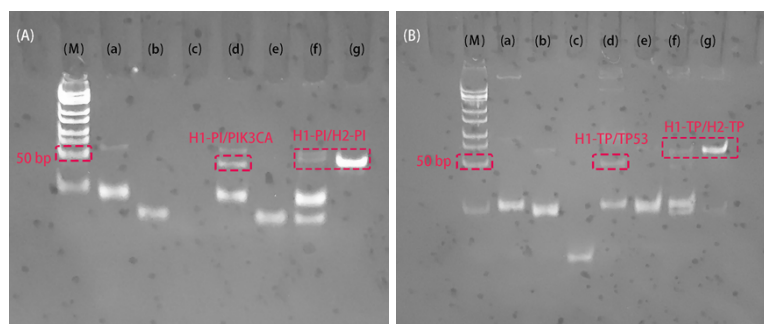

**Figure S1** Gel electrophoresis analysis of the CHA system for PIK3CA and TP53. (A) Lane a~g: H1-PI, H2-PI, PIK3CA, H1-PI+PIK3CA, H2-PI+PIK3CA, H1-PI+H2-PI, H1-PI+H2-PI+PIK3CA. Lane M: Marker (25 bp~500 bp). (A) Lane a~g: H1-TP, H2-TP, TP53, H1-TP+TP53, H2-TP+TP53, H1-TP+H2-TP, H1-TP+H2-TP+TP53. Lane M: Marker (25 bp~500 bp).

**Table S3** Comparison with MCE based DNA detection methods

| Method | Analyte | Detection | LOD | Ref. |
|--------|---------|-----------|-----|------|
|--------|---------|-----------|-----|------|

|                                                                       |                | range                    |                      |           |
|-----------------------------------------------------------------------|----------------|--------------------------|----------------------|-----------|
| Isothermal strand-displacement<br>polymerase reaction                 | mecA gene      | 1-100 nM                 | 12.3 pM              | [1]       |
| Defective T junction-mediated<br>strand displacement<br>amplification | 16S rDNA       | 10 pM-10 nM              | 10 pM                | [2]       |
| Crispr-Cas12a enzyme-derived<br>nucleic acid detection                | 16S rDNA       | 100 pM-500<br>nM         | 45 pM                | [3]       |
| Catalytic hairpin assembly<br>reaction                                | PIK3CA<br>TP53 | 50 pM-1 nM<br>50 pM-1 nM | 20.35 pM<br>19.61 pM | This work |

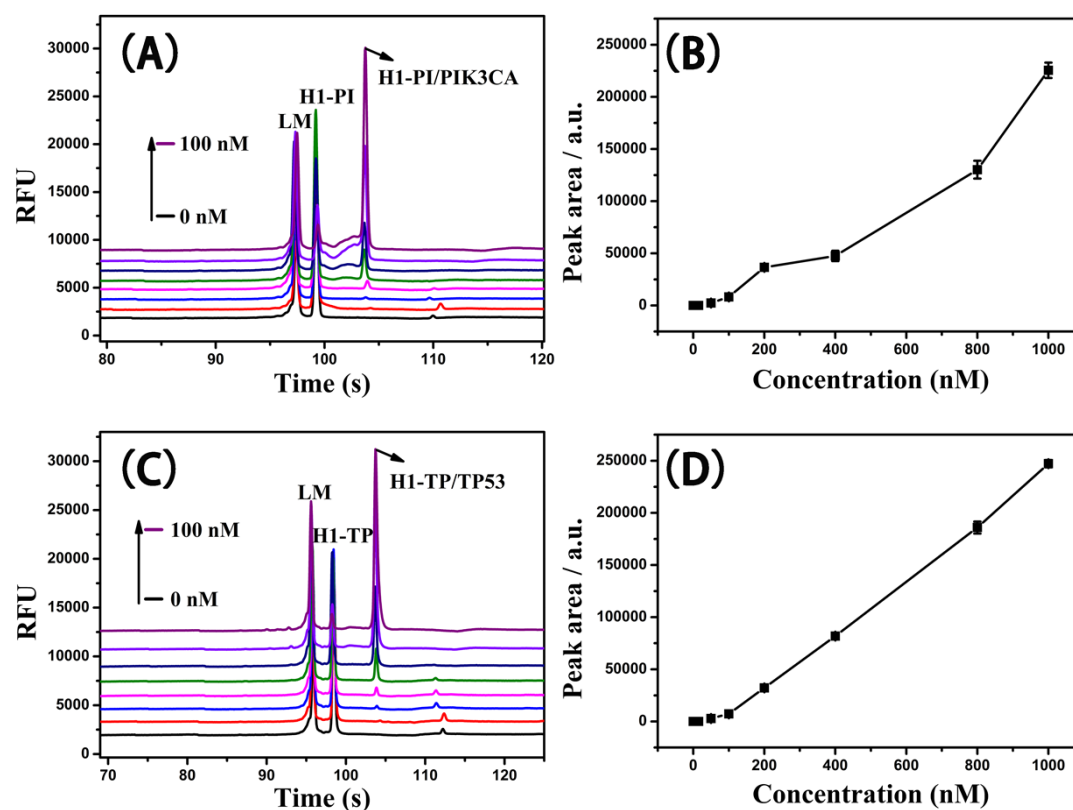

**Figure S2** (A) and (C) the non-CHA amplification NGCE assay results. (A) PIK3CA, (C) TP53. (B) and (D) corresponding calibration curve to different concentration of targets PIK3CA and TP53, respectively (0,15/20,50,100,200,400,800,1000 nM) ◦ (error bar : n=3)

**Table S4**  $\Delta G$  of H1/ctDNA(base mismatch) complexes

| Targets | Name | $\Delta G$ (kcal/mol) |
|---------|------|-----------------------|
|---------|------|-----------------------|

|        |              |        |
|--------|--------------|--------|
| PIK3CA | H1-PI/MT1-PI | -20.25 |
|        | H1-PI/MT3-PI | -17.7  |
| TP53   | H1-TP/MT1-TP | -30.27 |
|        | H1-TP/MT1-TP | -26.26 |

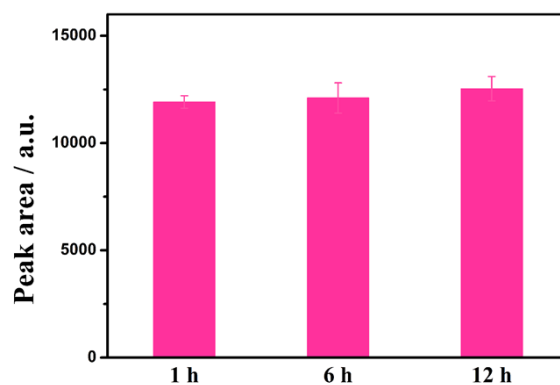

**Figure S3** NGCE-LEDIF analysis of CHA complex of PIK3CA system after incubated for different time.

## References

- [1] Y. Lu, F. Luo, Z. Li, G. Dai, Z. Chu, J. Zhang, F. Zhang, Q. Wang and P. He, *Talanta*, 2020, **222**, 121686.
- [2] F. Luo, Y. Lu, X. Geng, Z. Li, G. Dai, Z. Chu, J. Zhang, F. Zhang, P. He and Q. Wang, *Analytical Chemistry*, 2021, **93**, 3551-3558.
- [3] F. Luo, X. Geng, Z. Li, G. Dai, Z. Chu, P. He, F. Zhang and Q. Wang, *RSC Advances*, 2022, **12**, 22219-22225.
